# Supplementary material for: An image-based RNAi screen identifies SH3BP1 as a key effector of Semaphorin 3E–PlexinD1 signaling
Source: PubMed Central journal article supplement — J Cell Biol. 2014 May 26;205(4):573–90. doi: 10.1083/jcb.201309004 (PMC4033773; doi:10.1083/jcb.201309004), 2014-05-26
Supplement: supp_jcb.201309004_JCB_201309004_sm.pdf [file supp_jcb.201309004_JCB_201309004_sm.pdf]

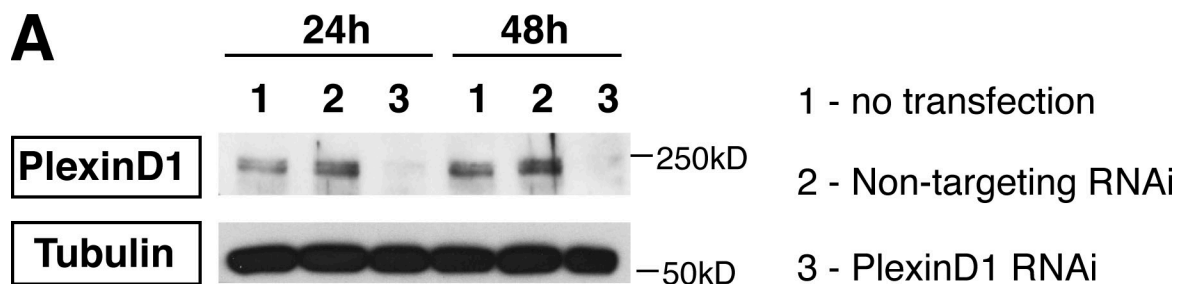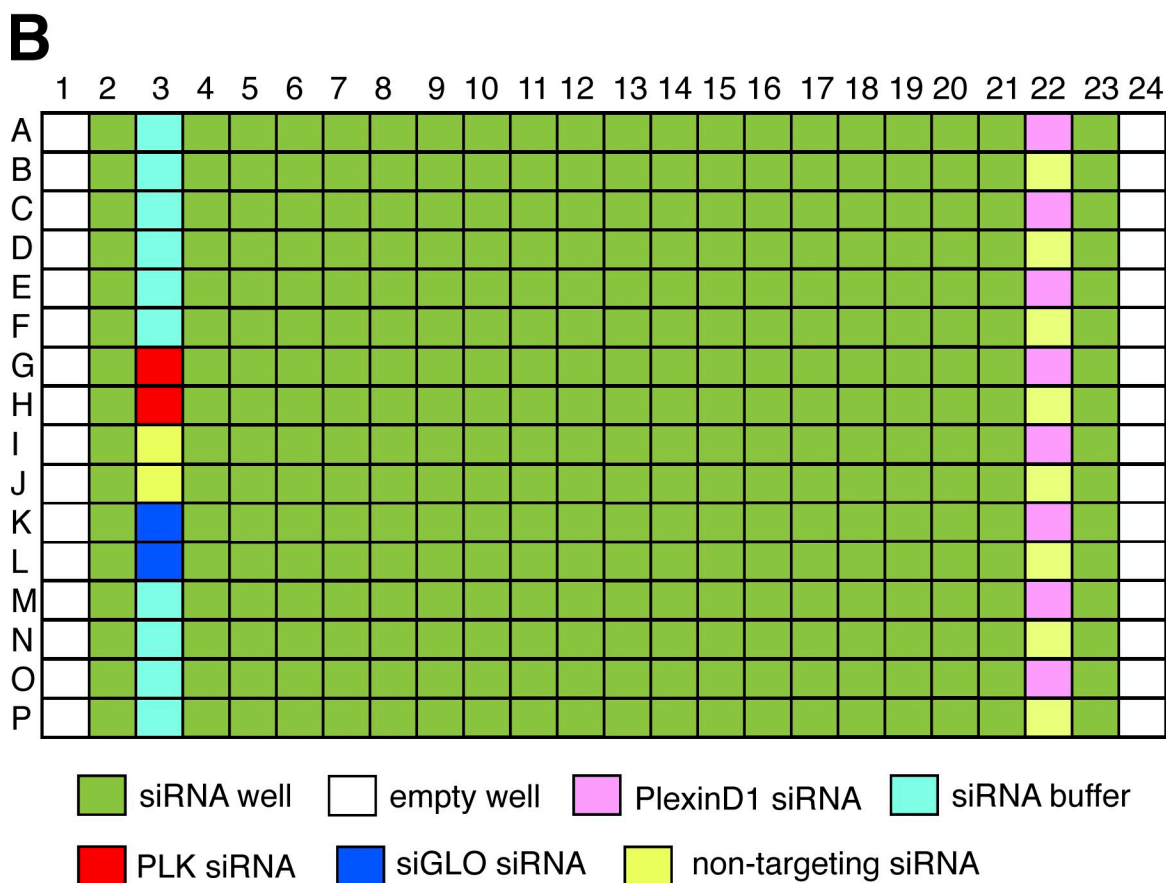

Figure S1. **Endogenous PlexinD1 expression in HUVECs could be down-regulated by specific PlexinD1 siRNA and used as a positive control in the screen.** (A) PlexinD1 siRNA led to a depletion in endogenous PlexinD1 in HUVECs. HUVECs transfected with PlexinD1 siRNA were lysed and analyzed by immunoblotting with PlexinD1 antibody. Endogenous PlexinD1 was efficiently depleted 24 h and 48 h after transfection with PlexinD1 siRNA. Tubulin served as a loading control. (B) Schematic representation of a 384-well plate with all the necessary controls for our screen. PlexinD1 siRNA was used in each plate as a positive control.

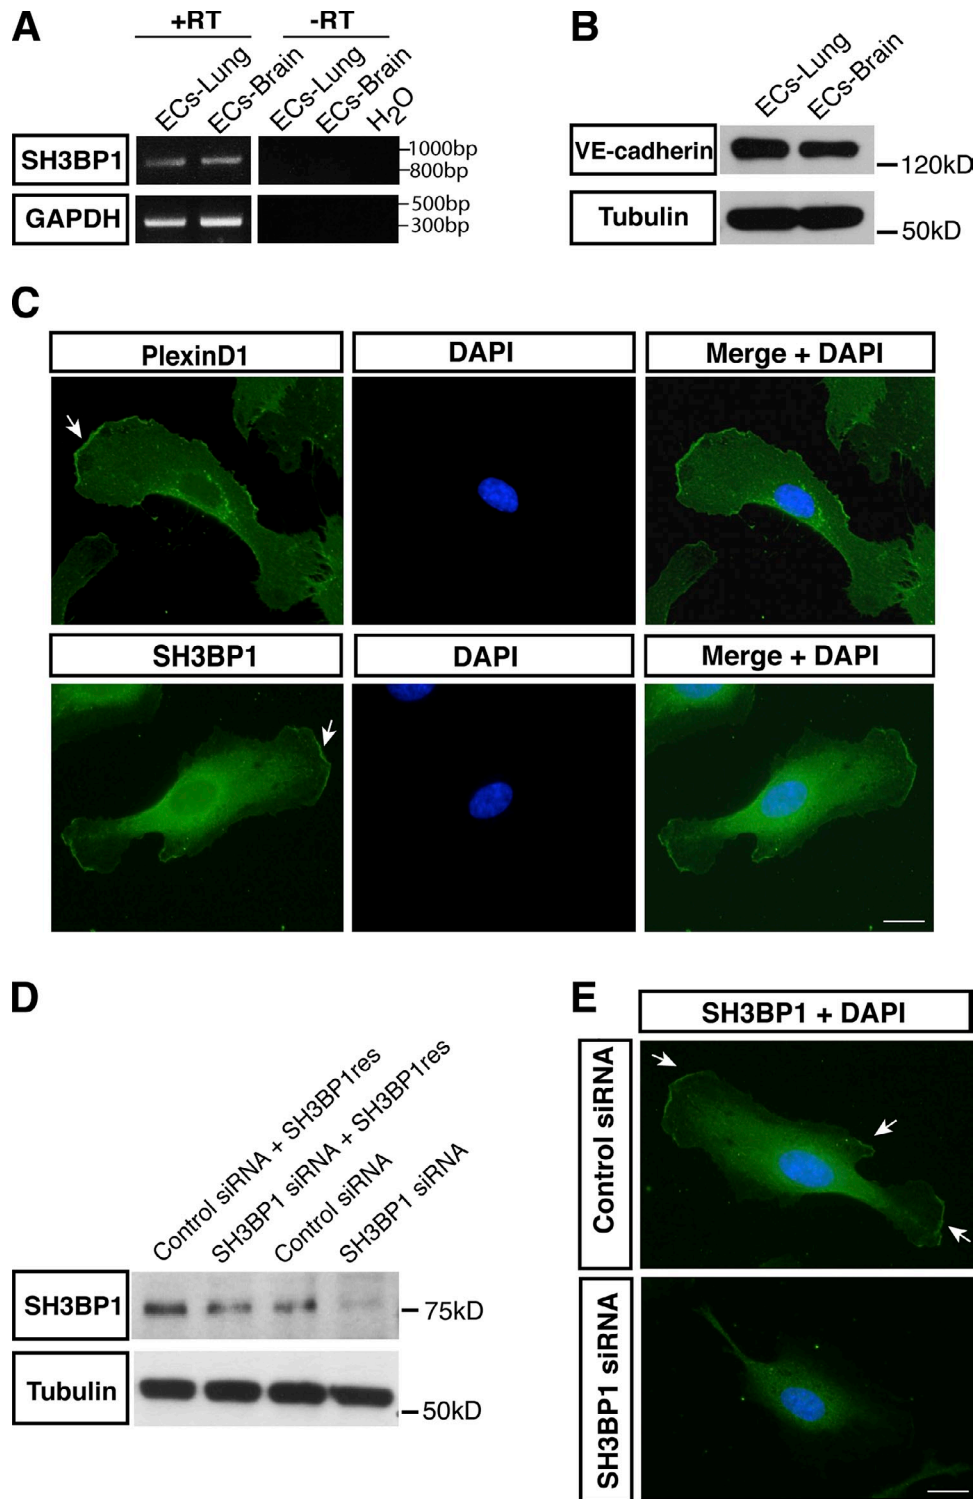

Figure S2. **Expression of SH3BP1 and specificity of SH3BP1 siRNA.** (A) SH3BP1 was expressed in lung and brain ECs isolated from E18.5 mouse embryos. RT-PCR with SH3BP1 and GAPDH primers is shown. (B) Cells used for RT-PCR were indeed ECs. Western blotting with endothelial marker VE-cadherin is shown. Tubulin served as a loading control. (C) SH3BP1 was expressed in HUVECs in a similar pattern as PlexinD1. Immunohistochemistry with SH3BP1 and PlexinD1 antibodies is shown. Arrows indicate the localization of SH3BP1 and PlexinD1 in the leading edge of the cell. Bar, 10  $\mu$ m. (D) Specific SH3BP1 siRNA down-regulated SH3BP1 protein. HUVECs were transfected with SH3BP1 siRNA alone or together with an siRNA-resistant rescue construct, lysed, and analyzed by immunoblotting with SH3BP1 antibody. Endogenous SH3BP1 was efficiently depleted in SH3BP1 siRNA-transfected cells, but depletion of SH3BP1 could be restored by an siRNA-resistant rescue construct. Tubulin served as a loading control. (E) SH3BP1 siRNA down-regulated SH3BP1 in the leading edge of the cell. Cells were transfected with control or SH3BP1 siRNA and immunostained with SH3BP1 antibody. SH3BP1 was depleted in SH3BP1 siRNA-transfected cells in the leading edge of the cells. Some level of cytoplasmic expression was still observed. Control cells showed unchanged localization of SH3BP1 protein. Arrows indicate unchanged localization of SH3BP1. Bar, 10  $\mu$ m.

Sema3E

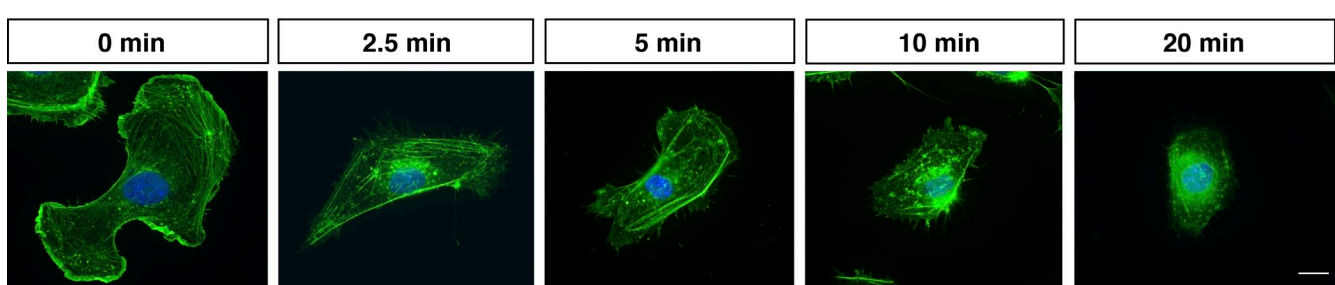

Figure S3. **Sema3E-regulated cytoskeleton changes.** HUVECs were treated with Sema3E at 0, 2.5, 5, 10, and 20 min, and stained with phalloidin to label actin cytoskeleton. Noticeable changes were already observed at 2.5 and 5 min after ligand treatment. Strong actin changes were present at later time points of Sema3E treatment. Bar, 10  $\mu$ m.

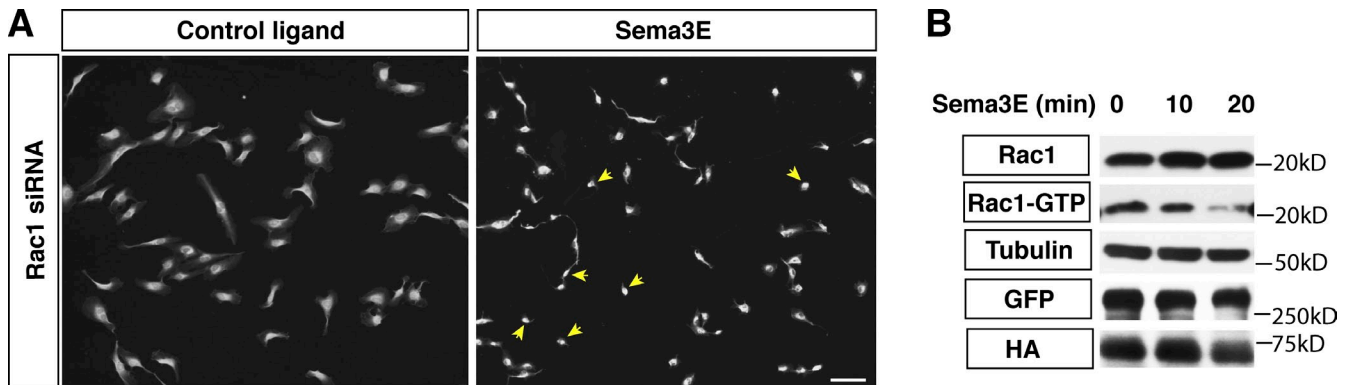

Figure S4. **Rac1 is regulated by Sema3E.** (A) Depletion of Rac1 led to a hypercollapse of HUVECs upon Sema3E treatment. Automated imaging of Rac1 siRNA-transfected cells treated with Sema3E or control ligand is shown. Arrows indicate hypercollapsed cells. Bar, 100  $\mu$ m. (B) Rac1 activity in HEK293T cells. HEK293T cells were overexpressed with PlexinD1-GFP and SH3BP1-HA constructs. After 48 h, cells were treated with Sema3E for 0, 10, and 20 min, and Rac1 activity pull-down was performed. Rac1-GTP is down-regulated after 20 min of Sema3E treatment. Rac1-GTP, total Rac1, GFP, HA, and Tubulin blots are shown.

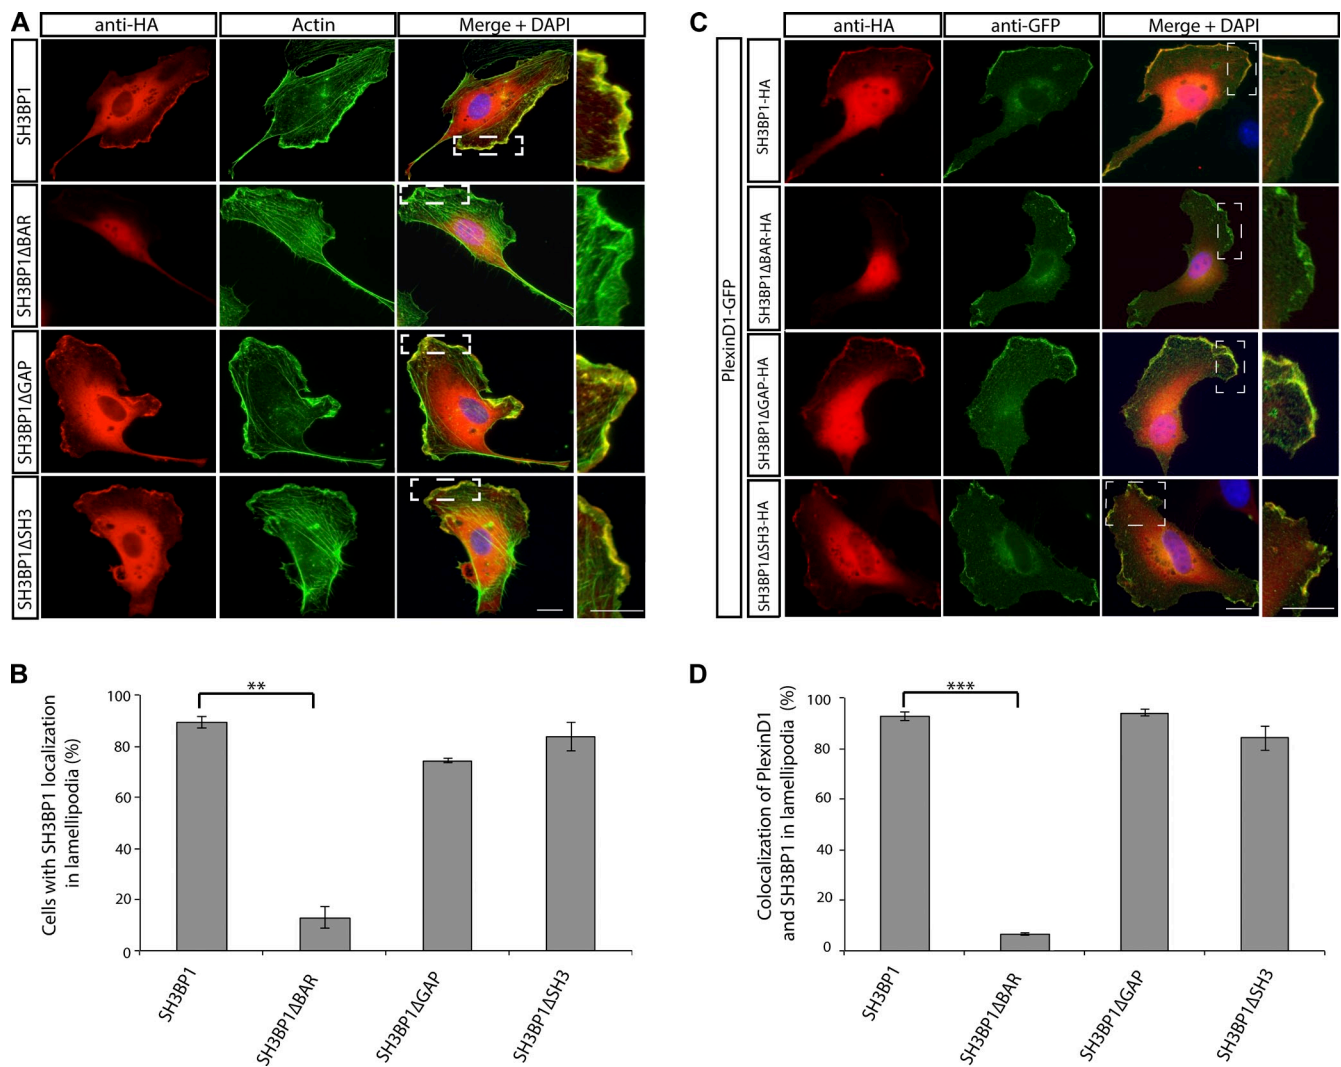

Figure S5. **SH3BP1ΔBAR did not colocalize with PlexinD1 in the lamellipodia.** (A) Localization of SH3BP1 constructs in lamellipodia. HUVECs were transfected with SH3BP1 constructs and stained with HA antibody and phalloidin. SH3BP1, SH3BP1ΔGAP, and SH3BP1ΔSH3 were present in cell lamellipodia, whereas SH3BP1ΔBAR localization was seen mostly in the cytoplasm. Boxed regions are enlarged on the right. Bar, 10 μm. (B) Quantification of the results presented in A.  $n = 3$ ; \*\*,  $P < 0.001$ . Error bars indicate SEM. (C) Colocalization of SH3BP1 constructs with PlexinD1 at the leading edge of the cell. HUVECs were cotransfected with PlexinD1 and SH3BP1 constructs and stained with GFP and HA antibodies. SH3BP1ΔBAR did not colocalize with PlexinD1 at the leading edge of the cell. Boxed regions are enlarged on the right. Bar, 10 μm. (D) Quantification of the results presented in C.  $n = 3$ ; \*\*\*,  $P < 0.0001$ . Error bars indicate SEM.

Table S1. Exemplar genes demonstrating Sema3E-induced hypercollapse following gene down-regulation

| Gene symbol | GenBank accession number | Gene name                                                     |
|-------------|--------------------------|---------------------------------------------------------------|
| CNKSR1      | NM_006314                | Connector Enhancer of kinase suppressor of Ras 1              |
| COPB2       | NM_004766                | Coatomer Protein Complex, Subunit $\beta$ 2                   |
| STYK1       | NM_018423                | Serine/threonine/tyrosine kinase 1                            |
| CARD14      | NM_024110                | Caspase recruitment domain family, member 14                  |
| AKAP11      | NM_016248                | A kinase (PRKA) anchor protein 11                             |
| ALK         | NM_004304                | Anaplastic lymphoma receptor tyrosine kinase                  |
| BUB1B       | NM_001211                | BUB1 mitotic checkpoint serine/threonine kinase B             |
| BLNK        | NM_013314                | B-cell linker                                                 |
| AVPR1B      | NM_000707                | Arginine vasopressin receptor 1B                              |
| ILK         | NM_004517                | Integrin-linked kinase                                        |
| RAC1        | NM_018890                | Ras-related C3 botulinum toxin substrate 1                    |
| PRPS2       | NM_002765                | Phosphoribosyl pyrophosphate synthetase 2                     |
| KIT         | NM_000222                | V-kit Hardy-Zuckerman 4 teline sarcoma viral oncogene homolog |
| PRKCN       | NM_005813                | Protein kinase D3                                             |
| PDGFRB      | NM_002609                | Platelet-derived growth factor receptor, $\beta$ polypeptide  |
| RIOK3       | NM_003831                | RIO kinase 3                                                  |
| RPS6KA3     | NM_004586                | Ribosomal protein S6 kinase 90kD polypeptide                  |
| TYK2        | NM_003331                | Tyrosine kinase 2                                             |
| TLK1        | NM_012290                | Tousled-like kinase 1                                         |
| TGFBR2      | NM_003242                | Transforming growth factor, beta receptor II                  |

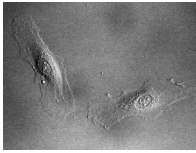

Video 1. **Control siRNA-transfected cells underwent morphological changes and exhibited cell collapse in response to Sema3E treatment.** Control siRNA-transfected HUVECs were analyzed after addition of Sema3E ligand with a microscope (VivaView FL LCV-110; Olympus). Images were taken every 10 s for 20 min (frame rate of replay: 7 frames per second).

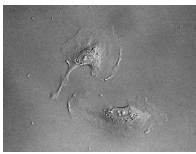

Video 2. **PlexinD1 siRNA-transfected cells did not display any morphological changes after Sema3E treatment.** PlexinD1 siRNA-transfected HUVECs were analyzed after the addition of Sema3E ligand with a microscope (VivaView FL LCV-110; Olympus). Images were taken every 10 s for 20 min (frame rate of replay: 7 frames per second).

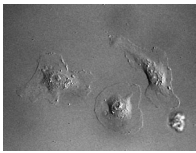

Video 3. **SH3BP1 siRNA-transfected cells did not display any morphological changes after Sema3E treatment.** SH3BP1 siRNA-transfected HUVECs were analyzed after the addition of Sema3E ligand with a microscope (VivaView FL LCV-110; Olympus). Images were taken every 10 s for 20 min (frame rate of replay: 7 frames per second).

**Table S2 gives a list of genes identified in the secondary screen.**

**A custom MATLAB algorithm is available for download as a TXT file. This program processes the images after they have been segmented by CellProfiler, analyzes the protrusions of each cell by shrinking the cells and comparing with the original one, measures object properties, and merges sections belonging to the same cell back together.**

## 1. Transcription factors

### Specific

| Gene Symbol | Hit | Genbank accession number | Gene name                                               |
|-------------|-----|--------------------------|---------------------------------------------------------|
| LITAF       | 2/4 | NM_004862                | lipopolysaccharide-induced TNF factor                   |
| TRIM29      | 2/4 | NM_012101                | tripartite motif-containing 29                          |
| ZNF228      | 2/4 | NM_013380                | zinc finger protein 228                                 |
| ZNF444      | 2/4 | NM_018337                | zinc finger protein 444                                 |
| FOXA1       | 2/4 | NM_004496                | forkhead box A1                                         |
| HEY1        | 2/4 | NM_012258                | hairy/enhancer-of-split related with YRPW motif 1       |
| NFIC        | 2/4 | NM_005597                | nuclear factor I/C (CCAAT-binding transcription factor) |
| TRIM8       | 2/4 | NM_030912                | tripartite motif-containing 8                           |
| IRF3        | 3/4 | NM_001571                | interferon regulatory factor 3                          |
| KLF13       | 3/4 | NM_015995                | Kruppel-like factor 13                                  |
| NKX3        | 3/4 | NM_006167                | NK3 transcription factor related, locus 1 (Drosophila)  |
| DMRT2       | 3/4 | NM_181872                | doublesex and mab-3 related transcription factor 2      |
| HES4        | 3/4 | NM_021170                | hairy and enhancer of split 4 (Drosophila)              |
| CREG1       | 4/4 | NM_003851                | cellular repressor of E1A-stimulated genes 1            |

### Non-Specific

|        |     |           |                                                           |
|--------|-----|-----------|-----------------------------------------------------------|
| SET    | 2/4 | NM_003011 | SET translocation (myeloid leukemia-associated)           |
| SETMAR | 2/4 | NM_006515 | SET domain and mariner transposase fusion gene            |
| UHRF1  | 2/4 | NM_013282 | ubiquitin-like, containing PHD and RING finger domains, 1 |
| EP300  | 2/4 | NM_001429 | E1A binding protein p300                                  |

|        |     |           |                                                         |
|--------|-----|-----------|---------------------------------------------------------|
| GTF2H4 | 2/4 | NM_001517 | general transcription factor IIIH, polypeptide 4, 52kDa |
| MBD3   | 2/4 | NM_003926 | methyl-CpG binding domain protein 3                     |
| PCAF   | 3/4 | NM_003884 | p300/CBP-associated factor                              |
| MIZF   | 4/4 | NM_015517 | MBD2-interacting zinc finger                            |

### Histone

|           |     |           |                                              |
|-----------|-----|-----------|----------------------------------------------|
| HIST1H1C  | 2/4 | NM_005319 | histone cluster 1, H1c                       |
| CHAF1B    | 3/4 | NM_005441 | chromatin assembly factor 1, subunit B (p60) |
| HIST2H2BE | 3/4 | NM_003528 | histone cluster 2, H2be                      |

## 2. Translation Factors

### Specific

| Gene Symbol | Hit | Genbank accession number | Gene name                                                              |
|-------------|-----|--------------------------|------------------------------------------------------------------------|
| SNRPN       | 2/4 | NM_003093                | small nuclear ribonucleoprotein polypeptide C                          |
| TCEFG1      | 2/4 | NM_006706                | transcription elongation regulator 1                                   |
| GRSF1       | 2/4 | NM_002092                | G-rich RNA sequence binding factor 1                                   |
| HNRPF       | 3/4 | NM_004966                | heterogeneous nuclear ribonucleoprotein F                              |
| GEMIN4      | 3/4 | NM_015721                | gem (nuclear organelle) associated protein 4                           |
| LSM5        | 4/4 | NM_012322                | LSM5 homolog, U6 small nuclear RNA associated ( <i>S. cerevisiae</i> ) |

### Non-specific

|        |     |           |                                                                    |
|--------|-----|-----------|--------------------------------------------------------------------|
| EIF3S1 | 2/4 | NM_003758 | eukaryotic translation initiation factor 3, subunit 1 alpha, 35kDa |
| GTF2H4 | 2/4 | NM_001517 | general transcription factor IIIH, polypeptide 4, 52kDa            |

|        |     |           |                                                       |
|--------|-----|-----------|-------------------------------------------------------|
| MRPS33 | 2/4 | NM_016071 | mitochondrial ribosomal protein S33                   |
| EIF1AY | 4/4 | NM_004681 | eukaryotic translation initiation factor 1A, Y-linked |

### 3. Endocytosis/ Exocytosis/ Vesicle/ Protein Trafficking

| Gene Symbol | Hit | Genbank accession number | Gene name                                                |
|-------------|-----|--------------------------|----------------------------------------------------------|
| ARC         | 3/4 | NM_015193                | activity-regulated cytoskeleton-associated protein       |
| NECAP1      | 3/4 | NM_015509                | NECAP endocytosis associated 1                           |
| RAB3-GAP150 | 2/4 | NM_012414                | RAB3 GTPase activating protein subunit 2 (non-catalytic) |
| STXBP6      | 3/4 | NM_014178                | syntaxin binding protein 6 (amisyn)                      |
| SLC30A3     | 2/4 | NM_003459                | solute carrier family 30 (zinc transporter), member 3    |
| TBL1X       | 2/4 | NM_005647                | transducin (beta)-like 1X-linked                         |
| SNX1        | 2/4 | NM_003099                | sorting nexin 1                                          |
| GOLPH3L     | 3/4 | NM_018178                | golgi phosphoprotein 3-like                              |
| KIF20A      | 3/4 | NM_005733                | kinesin family member 20A                                |

### 4. Cytoskeletal Proteins and Regulatory Proteins

#### Cytoskeletal Components

| Gene Symbol | Hit | Genbank accession number | Gene name                |
|-------------|-----|--------------------------|--------------------------|
| TUBB4       | 3/4 | NM_006087                | tubulin, beta 4          |
| KIF11       | 4/4 | NM_004523                | kinesin family member 11 |

#### Regulators of Cytoskeletal Components

|          |     |           |                                                          |
|----------|-----|-----------|----------------------------------------------------------|
| BAIAP2L1 | 2/4 | NM_018842 | BAI1-associated protein 2-like 1                         |
| MAPK8IP3 | 2/4 | NM_015133 | mitogen-activated protein kinase 8 interacting protein 3 |



|        |     |           |                                  |
|--------|-----|-----------|----------------------------------|
| TBL1X  | 2/4 | NM_005647 | transducin (beta)-like 1X-linked |
| MSN    | 3/4 | NM_002444 | moesin                           |
| KIF20A | 3/4 | NM_005733 | kinesin family member 20A        |

## 5. Cell Division

### Cycle Regulators

| Gene Symbol | Hit | Genbank accession number | Gene name                            |
|-------------|-----|--------------------------|--------------------------------------|
| GPC1        | 2/4 | NM_002081                | glypican 1                           |
| HUS1B       | 2/4 | NM_148959                | HUS1 checkpoint homolog b (S. pombe) |
| CAPRIN1     | 3/4 | NM_005898                | cell cycle associated protein 1      |
| CCNE1       | 3/4 | NM_001238                | cyclin E1                            |
| SFRP1       | 3/4 | NM_003012                | secreted frizzled-related protein 1  |
| CCND1       | 4/4 | NM_053056                | cyclin D1                            |
| KIF11       | 4/4 | NM_004523                | kinesin family member 11             |

### DNA Regulators

|        |     |           |                                                          |
|--------|-----|-----------|----------------------------------------------------------|
| CNAP1  | 2/4 | NM_014865 | non-SMC condensin I complex, subunit D2                  |
| SET    | 2/4 | NM_003011 | SET translocation (myeloid leukemia-associated)          |
| RAD21  | 2/4 | NM_006265 | RAD21 homolog (S. pombe)                                 |
| RBMS2  | 2/4 | NM_002898 | RNA binding motif, single stranded interacting protein 2 |
| RRM1   | 3/4 | NM_001033 | ribonucleotide reductase M1 polypeptide                  |
| ESPL1  | 3/4 | NM_012291 | extra spindle pole bodies homolog 1 (S. cerevisiae)      |
| SMC4L1 | 3/4 | NM_005496 | structural maintenance of chromosomes 4                  |

|        |     |           |                                                            |
|--------|-----|-----------|------------------------------------------------------------|
| NIN    | 4/4 | NM_016350 | ninein (GSK3B interacting protein)                         |
| POLA2  | 4/4 | NM_002689 | polymerase (DNA directed), alpha 2 (70kD subunit)          |
| MYBL2  | 4/4 | NM_002466 | v-myb myeloblastosis viral oncogene homolog (avian)-like 2 |
| INCENP | 4/4 | NM_020238 | inner centromere protein antigens 135/155kDa               |
| TOP2A  | 4/4 | NM_001067 | topoisomerase (DNA) II alpha 170kDa                        |

## 6. Transmembrane Proteins

### Known Receptors

| Gene Symbol | Hit | Genbank accession number | Gene name                                                                                          |
|-------------|-----|--------------------------|----------------------------------------------------------------------------------------------------|
| ADCY7       | 2/4 | NM_001114                | adenylate cyclase 7                                                                                |
| THRB        | 2/4 | NM_000461                | thyroid hormone receptor, beta (erythroblastic leukemia viral (v-erb-a) oncogene homolog 2, avian) |
| FZD9        | 2/4 | NM_003508                | frizzled homolog 9 (Drosophila)                                                                    |
| FFAR1       | 3/4 | NM_005303                | free fatty acid receptor 1                                                                         |
| EPOR        | 4/4 | NM_000121                | erythropoietin receptor                                                                            |
| PLEXIND1    | 4/4 | NM_015103                | plexin D1                                                                                          |

### Other Transmembrane Proteins

|         |     |                         |                                                              |
|---------|-----|-------------------------|--------------------------------------------------------------|
| CAV3    | 2/4 | NM_001234               | caveolin 3                                                   |
| GJA3    | 2/4 | NM_021954,<br>NM_029726 | gap junction protein, alpha 3, 46kDa                         |
| LMNB2   | 2/4 | NM_032737               | lamin B2                                                     |
| MUCDHL  | 2/4 | NM_017717               | mucin-like protocadherin                                     |
| XPNPEP2 | 2/4 | NM_003399               | X-prolyl aminopeptidase (aminopeptidase P) 2, membrane-bound |

|         |     |           |                                                                |
|---------|-----|-----------|----------------------------------------------------------------|
| POM121  | 3/4 | NM_172020 | POM121 membrane glycoprotein (rat)                             |
| SLC13A4 | 3/4 | NM_012450 | solute carrier family 13 (sodium/sulfate symporters), member 4 |
| GPR27   | 4/4 | NM_018971 | G protein-coupled receptor 27                                  |

#### Ion Channels

|       |     |           |                                                                     |
|-------|-----|-----------|---------------------------------------------------------------------|
| CLIC2 | 2/4 | NM_001289 | chloride intracellular channel 2                                    |
| CLCA4 | 2/4 | NM_012128 | chloride channel, calcium activated, family member 4                |
| KCND1 | 2/4 | NM_004979 | potassium voltage-gated channel, Shal-related subfamily, member 1   |
| KCNK9 | 2/4 | NM_016601 | potassium channel, subfamily K, member 9                            |
| KCNA5 | 3/4 | NM_002234 | potassium voltage-gated channel, shaker-related subfamily, member 5 |

#### Ligands/ Secreted Proteins

|          |     |                         |                                                              |
|----------|-----|-------------------------|--------------------------------------------------------------|
| GDNF     | 2/4 | NM_000514,<br>NM_015802 | glial cell derived neurotrophic factor                       |
| RBP4     | 3/4 | NM_006744               | retinol binding protein 4, plasma                            |
| SERPINC1 | 3/4 | NM_000488               | serpin peptidase inhibitor, clade C (antithrombin), member 1 |
| SFRP1    | 3/4 | NM_003012               | secreted frizzled-related protein 1                          |

### 7. Second Messenger Associated Proteins

#### Ca<sup>2+</sup> Related

| Gene Symbol | Hit | Genbank accession number | Gene name |
|-------------|-----|--------------------------|-----------|
|-------------|-----|--------------------------|-----------|

|         |     |           |                                                            |
|---------|-----|-----------|------------------------------------------------------------|
| CLCA4   | 2/4 | NM_012128 | chloride channel, calcium activated, family member 4       |
| STRN3   | 2/4 | NM_014574 | striatin, calmodulin binding protein 3                     |
| VSNL1   | 2/4 | NM_003385 | visinin-like 1                                             |
| FFAR1   | 3/4 | NM_005303 | free fatty acid receptor 1                                 |
| CAMK2N1 | 3/4 | NM_018584 | calcium/calmodulin-dependent protein kinase II inhibitor 1 |

#### cAMP Related

|       |     |           |                          |
|-------|-----|-----------|--------------------------|
| ADCY7 | 2/4 | NM_001114 | adenylate cyclase 7      |
| EP300 | 2/4 | NM_001429 | E1A binding protein p300 |

### 8. Signaling Molecules

#### Small GTPases/ Regulatory Proteins

| Gene Symbol | Hit | Genbank accession number | Gene name                                                |
|-------------|-----|--------------------------|----------------------------------------------------------|
| RAB3GAP2    | 2/4 | NM_012414                | RAB3 GTPase activating protein subunit 2 (non-catalytic) |
| SH3BP1      | 2/4 | NM_018957                | SH3-domain binding protein 1                             |
| RAP2A       | 3/4 | NM_021033                | RAP2A, member of RAS oncogene family                     |
| KIF20A      | 3/4 | NM_005733                | kinesin family member 20A                                |
| RACGAP1     | 4/4 | NM_013277                | Rac GTPase activating protein 1                          |

#### Signaling Kinases/ Phosphatases

|          |     |           |                                                             |
|----------|-----|-----------|-------------------------------------------------------------|
| DGKZ     | 2/4 | NM_003646 | diacylglycerol kinase, zeta 104kDa                          |
| IRAK1    | 2/4 | NM_001569 | interleukin-1 receptor-associated kinase 1                  |
| MAPKAPK5 | 2/4 | NM_003668 | mitogen-activated protein kinase-activated protein kinase 5 |

|        |     |           |                                     |
|--------|-----|-----------|-------------------------------------|
| MINK1  | 2/4 | NM_015716 | misshapen-like kinase 1 (zebrafish) |
| AKAP10 | 3/4 | NM_007202 | A kinase (PRKA) anchor protein 10   |

### Other Signaling Molecules

|           |     |                         |                                               |
|-----------|-----|-------------------------|-----------------------------------------------|
| HBP17     | 2/4 | NM_005130               | fibroblast growth factor binding protein 1    |
| PROSAPIP2 | 2/4 | XM_375469               | TBK1 binding protein 1                        |
| CCL4      | 2/4 | NM_002984               | chemokine (C-C motif) ligand 4                |
| SRGAP2    | 2/4 | NM_015326,<br>XM_059095 | SLIT-ROBO Rho GTPase activating protein 2     |
| GADD45A   | 3/4 | NM_001924               | growth arrest and DNA-damage-inducible, alpha |

## 9. Apoptosis

### Pro-Apoptotic

| Gene Symbol | Hit | Genbank accession number | Gene name                                  |
|-------------|-----|--------------------------|--------------------------------------------|
| NCR1        | 3/4 | NM_004829                | natural cytotoxicity triggering receptor 1 |
| CASP8AP2    | 4/4 | NM_012115                | CASP8 associated protein 2                 |

### Anti-Apoptotic

|       |     |           |                                                             |
|-------|-----|-----------|-------------------------------------------------------------|
| BRE   | 2/4 | NM_004899 | brain and reproductive organ-expressed (TNFRSF1A modulator) |
| BIRC5 | 2/4 | NM_001168 | baculoviral IAP repeat-containing 5 (survivin)              |
| SIVA1 | 3/4 | NM_006427 | SIVA1, apoptosis-inducing factor                            |

## 10. Immune System

| Gene Symbol | Hit | Genbank accession number | Gene name        |
|-------------|-----|--------------------------|------------------|
| DEFB1       | 2/4 | NM_005218                | defensin, beta 1 |

### 11. Basic Cell Biological Function

| Gene Symbol  | Hit | Genbank accession number | Gene name                                                                        |
|--------------|-----|--------------------------|----------------------------------------------------------------------------------|
| ALDH18A1     | 2/4 | NM_002860                | aldehyde dehydrogenase 18 family, member A1                                      |
| ARSA         | 2/4 | NM_000487                | arylsulfatase A                                                                  |
| CAD          | 2/4 | NM_004341                | carbamoyl-phosphate synthetase 2, aspartate transcarbamylase, and dihydroorotase |
| CYP11B1      | 2/4 | NM_000497                | cytochrome P450, family 11, subfamily B, polypeptide 1                           |
| GALNAC4S-6ST | 2/4 | NM_014863                | B cell RAG associated protein                                                    |
| PAPSS1       | 2/4 | NM_005443                | 3'-phosphoadenosine 5'-phosphosulfate synthase 1                                 |
| POLG         | 2/4 | NM_002693                | polymerase (DNA directed), gamma                                                 |
| RBP3         | 2/4 | NM_006744                | retinol binding protein 4, plasma                                                |
| ACOX1        | 2/4 | NM_004035                | acyl-Coenzyme A oxidase 1, palmitoyl                                             |
| MGAT1        | 2/4 | NM_002406                | mannosyl (alpha-1,3-)-glycoprotein beta-1,2-N-acetylglucosaminyltransferase      |
| FTL          | 3/4 | NM_000146                | ferritin, light polypeptide                                                      |
| CPS1         | 3/4 | NM_001875                | carbamoyl-phosphate synthetase 1, mitochondrial                                  |

### 12. Not Otherwise Classified

| Gene Symbol | Hit | Genbank accession number | Gene name                                            |
|-------------|-----|--------------------------|------------------------------------------------------|
| PHEMX       | 2/4 | NM_005705                | tetraspanin 32                                       |
| PRKDC       | 2/4 | NM_006904                | protein kinase, DNA-activated, catalytic polypeptide |

|         |     |           |                                       |
|---------|-----|-----------|---------------------------------------|
| NEUGRIN | 2/4 | NM_016645 | neugrin, neurite outgrowth associated |
| PRG-3   | 3/4 | NM_017753 | plasticity related gene 3             |

### 13. No Functional Data

| Gene Symbol | Hit | Genbank accession number | Gene name                                                     |
|-------------|-----|--------------------------|---------------------------------------------------------------|
| CPorf98     | 2/4 | NM_152572                | chromosome 9 open reading frame 98                            |
| PID1        | 2/4 | NM_017933                | phosphotyrosine interaction domain containing 1               |
| PTCD3       | 2/4 | NM_017952                | Pentatricopeptide repeat domain 3                             |
| ZNF646      | 2/4 | NM_014699                | zinc finger protein 646                                       |
| LY6H        | 2/4 | NM_002347                | lymphocyte antigen 6 complex, locus H                         |
| MAPBPIP     | 2/4 | NM_014017                | mitogen-activated protein-binding protein-interacting protein |
| RAB3IL1     | 2/4 | NM_013401                | RAB3A interacting protein (rabin3)-like 1                     |
| PDE6H       | 2/4 | NM_006205                | phosphodiesterase 6H, cGMP-specific, cone, gamma              |
| ANKIB1      | 2/4 | XM_377955                | ankyrin repeat and IBR domain containing 1                    |
| ZUBR1       | 2/4 | NM_020765                | zinc finger, UBR1 type 1                                      |
| SCML1       | 2/4 | NM_006746                | sex comb on midleg-like 1 (Drosophila)                        |
| IK          | 3/4 | NM_006083                | IK cytokine, down-regulator of HLA II                         |
| SPATA3      | 3/4 | NM_139073                | spermatogenesis associated 3                                  |
| C20orf4     | 3/4 | NM_015511                | chromosome 20 open reading frame 4                            |
| NMB         | 3/4 | NM_021077                | neuromedin B                                                  |
| LRRC20      | 4/4 | NM_018205                | leucine rich repeat containing 20                             |
| C16orf28    | 4/4 | NM_023076                | chromosome 16 open reading frame 28                           |
